# Supplementary material
Source: Springer Nature journal article supplement (https://www.springermedizin.de/resource/supplementary/12906_2001_8_MOESM1_ESM.pdf/9519316)

**A IL4**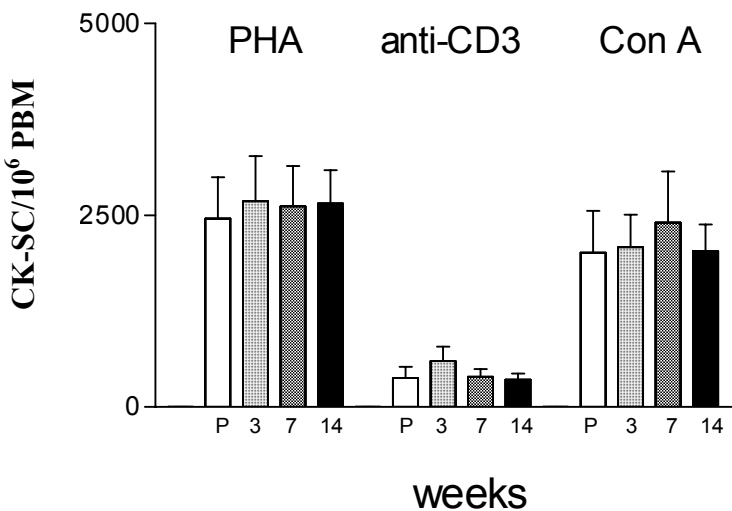**B IL12**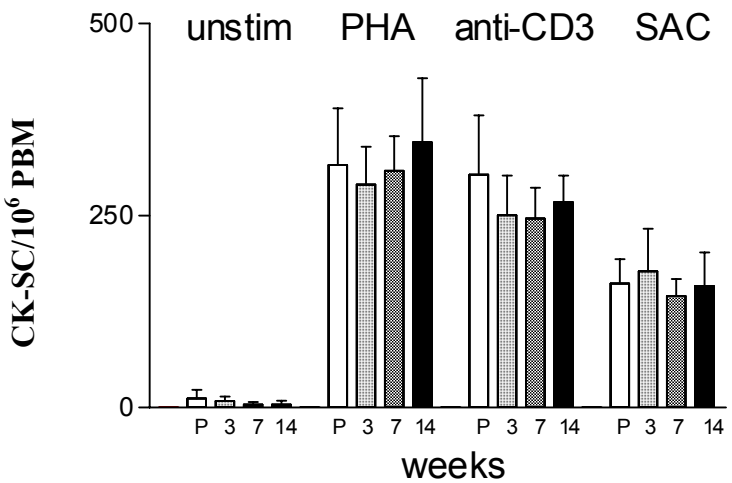

Supplement: MOESM1 [file 9519316]
